3. Chan MTV, Wang CY, Seet E, Tam S, Lai HY, Chew EFF, Wu WKK, Cheng BCP, Lam CKM, Short TG, Hui DSC, Chung F; Postoperative Vascular Complications in Unrecognized Obstructive Sleep Apnea (POSA) Study Investigators: Association of unrecognized obstructive sleep apnea with postoperative cardiovascular events in patients undergoing major noncardiac surgery. *JAMA* 2019; 321:1788–98
4. Bolden N, Posner KL, Domino KB, Auckley D, Benumof JL, Herway ST, Hillman D, Mincer SL, Overdyk F, Samuels DJ, Warner LL: Postoperative critical events associated with obstructive sleep apnea: Results from the Society of Anesthesia and Sleep Medicine Obstructive Sleep Apnea Registry. *Anesth Analg* 2020; 131:1032
5. Sakaguchi Y, Nozaki-Taguchi N, Hasegawa M, Ishibashi K, Sato Y, Isono S: Combination therapy of high-flow nasal cannula and upper-body elevation for postoperative sleep-disordered breathing: Randomized crossover trial. *ANESTHESIOLOGY* 2022; 137:15–27
6. Nishimura M: High-flow nasal cannula oxygen therapy in adults. *J Intensive Care* 2015; 3:15
7. Riaz M, Ravula S, Obesso PD, Nigam G, Baran AS: The effect of torso elevation on minimum effective continuous positive airway pressure for treatment of obstructive sleep apnea. *Sleep Breath* 2020; 24:499–504
8. Joosten SA, Edwards BA, Wellman A, Turton A, Skuza EM, Berger PJ, Hamilton GS: The effect of body position on physiological factors that contribute to obstructive sleep apnea. *Sleep* 2015; 38:1469–78
9. Walsh JH, Maddison KJ, Platt PR, Hillman DR, Eastwood PR: Influence of head extension, flexion, and rotation on collapsibility of the passive upper airway. *Sleep* 2008; 31:1440–7
10. Sutherland K, Vanderveken OM, Tsuda H, Marklund M, Gagnadoux F, Kushida CA, Cistulli PA: Oral appliance treatment for obstructive sleep apnea: An update. *J Clin Sleep Med* 2014; 10:215–27
11. Ohtsuka K, Baba R, Yamasawa W, Shirahama R, Hattori Y, Senoura H, Betsuyaku T, Fukunaga K: The effectiveness of nasal airway stent therapy for the treatment of mild-to-moderate obstructive sleep apnea syndrome. *Respiration* 2021; 100:193–200
12. American Society of Anesthesiologists Task Force on Perioperative Management of Patients with Obstructive Sleep Apnea: Practice guidelines for the perioperative management of patients with obstructive sleep apnea: An updated report by the American Society of Anesthesiologists Task Force on Perioperative Management of patients with obstructive sleep apnea. *ANESTHESIOLOGY* 2014; 120:268–86
13. Kompelli AR, Ni JS, Nguyen SA, Lentsch EJ, Neskey DM, Meyer TA: The outcomes of hypoglossal nerve stimulation in the management of OSA: A systematic review and meta-analysis. *World J Otorhinolaryngol Head Neck Surg* 2019; 5:41–88

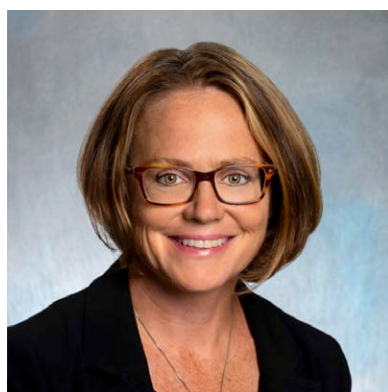

## Welcoming a New ANESTHESIOLOGY Editor

**K**ristin L. Schreiber, M.D., Ph.D., is the newest editor for ANESTHESIOLOGY. Dr. Schreiber is an Associate Professor at Harvard Medical School and Associate Vice Chair of Research in the Department of Anesthesiology, Perioperative, and Pain Medicine at Brigham and Women's Hospital in Boston. She completed her M.D. and a Ph.D. in neuroscience at the University of Minnesota, investigating reciprocal neural-immune interactions involved in infection and the development of persistent pain. She completed residency training at the University of Pittsburgh and fellowship at Brigham and Women's Hospital, where she practices clinically as a regional anesthesiologist. Her research program investigates the development of chronic pain after surgical injury, using psychosocial and psycho-

physical assessment tools, in addition to biomarkers, clinical characteristics, and sociodemographics, to predict who is most at risk. Her perioperative interventional studies incorporate this dense biopsychosocial assessment of individual patients into their design, to allow more nuanced assessment of differential efficacy of preventive perioperative interventions among patients, in order to ultimately inform more personalized care. In her quantitative sensory testing lab, she investigates differences in pain processing among individuals, including how subjective pain relates to changes in physiology, and how pain may be modulated by nonopioid analgesic techniques, ranging from regional anesthetic techniques to music.
